# Supplementary material
Source: Springer Nature journal article supplement (https://www.springermedizin.de/resource/supplementary/12885_2013_4281_MOESM1_ESM.pdf/9467202)
Supplement: MOESM1 [file 9467202]

|    |          |            |     |     |           |      |             |    |   |    |
|----|----------|------------|-----|-----|-----------|------|-------------|----|---|----|
| 31 | negative | 0.9        | 90% | 96% | pT3 N2a   | IIIA | IDC         | G3 | 4 | 2+ |
| 32 | negative | 0.6        | 89% | 0   | T3, N1    | IIIA | IDC         | G3 | 3 | 2+ |
| 33 | negative | 0.7        | 15% | 3%  | T2, N3    | IIIC | IDC         | G3 | 3 | 1+ |
| 34 | negative | 0          | 78% | 87% | T2, N2a   | IIIA | IDC         | G2 | 3 | 2+ |
| 35 | negative | IHC 1.7, P | 14% | 0   | T2, N3a   | IIIC | IDC         | G2 | 3 | 2+ |
| 36 | Negative | 0.6        | 31% | 65% | T2, N2    | IIIA | IDC, recurr | G3 | 2 | 3+ |
| 37 | Negative | 0          | 0%  | 70% | T3, N1    | IIIA | Metaplastid | G3 | 0 | 0+ |
| 38 | Negative | 0.7        | 9%  | 68% | T2, N2a   | IIIA | IDC         | G2 | 1 | 3+ |
| 39 | Negative | 0          | 80% | 87% | T4b, N3   | IIIC | IDC         | G3 | 1 | 2+ |
| 40 | Negative | 1.9        | 83% | 85% | T2, N2a   | IIIA | IDC         | G2 | 2 | 3+ |
| 41 | Neg      | 0          | 46% | 0%  | T4, N2    | IIIB | IDC         | G3 | 1 | 2+ |
| 42 | Neg      | 0.8        | 90% | 76% | T3, N2a   | IIIA | IDC         | G2 | 0 | 0+ |
|    |          |            |     |     |           |      |             |    |   |    |
| 43 | negative | 0.7        | 0   | 0   | pT2 N0 M1 | IV   | ILC         | G3 | 1 | 1+ |

**ER+/PR+ group**

| Case No | ER/PR/Her    | Her 2    | Ki-67 | p53 | T, N, M   | Stage | DX          | Hist Grade | Score of % cell Intensity |    |
|---------|--------------|----------|-------|-----|-----------|-------|-------------|------------|---------------------------|----|
| 1       | Positive     | Neg      | 2%    | 3%  | T1b, N0   | I     | IDC         | G2         | 2                         | 3+ |
| 2       | Positive     | Neg      | 5%    | 0%  | T1, N0    | I     | Colloid     | G1         | 4                         | 3+ |
| 3       | Positive     | Neg      | 86%   | 15% | T1, N0    | I     | IDC         | G3         | 4                         | 2+ |
| 4       | Positive     | Neg      | 7%    | 6%  | T1, N0    | I     | IDC         | G2         | 3                         | 3+ |
| 5       | Positive     | Neg      | 13%   | 16% | T1, N0    | I     | IDC         | G2         | 4                         | 3+ |
| 6       | Positive, 9% | Neg      | 0%    | 0%  | T1, Nx    | I     | ILC         | G2         | 3                         | 3+ |
| 7       | Positive     | Neg      | 11%   | 21% | T1min, N0 | I     | IDC         | G1         | 3                         | 3+ |
| 8       | Positive     | Neg      | 9%    | 0%  | T1c, N0   | I     | IDC         | G2         | 1                         | 2+ |
| 9       | Positive     | Neg      | 10%   | 6%  | T1, N0    | I     | ILC         | G1         | 3                         | 3+ |
| 10      | Positive     | Positive | 14%   | 17% | T1c, N0   | I     | IDC         | G2         | 3                         | 3+ |
| 11      | Positive     | Neg      | 15%   | 5%  | T1, Nx    | I     | IDC         | G1         | 3                         | 3+ |
| 12      | Positive, 8% | 1.6      | 15%   | 0%  | T1, N0    | I     | IDC         | G2         | 2                         | 3+ |
| 13      | Positive, 8% | Neg      | 12%   | 5%  | T1, N0    | IB    | IDC         | G2         | 3                         | 2+ |
| 14      | Neg, 0%, 3%  | 2.1      | 20%   | 0%  | T1, N0    | I     | IDC         | G3         | 1                         | 3+ |
|         |              |          |       |     |           |       |             |            |                           |    |
|         |              |          |       |     |           |       |             |            |                           |    |
| 15      | Positive     | Neg      | 4%    | 8%  | T1, N1    | IIA   | Colloid     | G2         | 4                         | 3+ |
| 16      | Positive     | Neg      | 0%    | 5%  | T1b,N1    | IIA   | IDC         | G2         | 3                         | 3+ |
| 17      | Positive     | Positive | 4%    | 0%  | T2, N1    | IIB   | ILC         | G2         | 2                         | 3+ |
| 18      | Positive     | Neg      | 18%   | 0%  | T2, N1    | IIB   | IDC         | G2         | 2                         | 2+ |
| 19      | Positive, 7% | Neg      | 0%    | 0%  | T2, N1    | IIB   | Tubular car | G1         | 4                         | 2+ |
| 20      | Positive     | Neg      | 18%   | 9%  | T2, N1    | IIB   | IDC         | G2         | 2                         | 3+ |
| 21      | Positive     | Neg      | 1%    | 3%  | T2, N1    | IIB   | IDC         | G2         | 2                         | 2+ |
| 22      | Positive     | Neg      | 0%    | 0%  | T1c, N1   | IIA   | IDC         | G1         | 4                         | 3+ |
| 23      | Positive     | Neg      | 13%   | 0%  | T2, N1    | IIB   | IDC         | G2         | 4                         | 3+ |
| 24      | Positive     | Neg      | 10%   | 43% | T2, N1    | IIB   | IDC         | G2         | 2                         | 2+ |
| 25      | Positive     | Neg      | 8%    | 13% | T1c, N1   | IIA   | IDC         | G2         | 4                         | 2+ |
| 26      | Positive     | Neg      | 4%    | 0%  | T2, N0    | IIA   | ILC         | G2         | 2                         | 2+ |
| 27      | Positive     | Neg      | 0%    | 0%  | T2, N0    | IIA   | IDC         | G2         | 4                         | 3+ |
| 28      | Positive, 0% | Positive | 2%    | 4%  | T2, N0    | IIA   | IDC         | G3         | 1                         | 1+ |
| 29      | Positive 15% | Positive | 20%   | 2%  | T2, N1    | IIB   | IDC         | G2         | 3                         | 3+ |
| 30      | Positive, 0% | Neg      | 90%   | 0%  | T2, N0    | IIA   | IDC         | G3         | 3                         | 2+ |
| 31      | Positive     | Neg      | 27%   | 25% | T2, N0    | IIA   | IDC         | G2         | 1                         | 2+ |
| 32      | Positive     | 1.5      | 16%   | 0%  | T2, N0    | IIA   | IDC         | G2         | 4                         | 3+ |

|    |             |           |     |     |          |       |         |    |   |    |
|----|-------------|-----------|-----|-----|----------|-------|---------|----|---|----|
| 33 | Neg, 0%, 1  | 0         | 5%  | 0%  | T1, N1   | IIA   | ILC     | G2 | 1 | 2+ |
|    |             |           |     |     |          |       |         |    |   |    |
| 34 | Positive    | Positive  | 9%  | 15% | T2, N3   | IIIC  | IDC     | G2 | 2 | 3+ |
| 35 | Positive, 3 | Neg       | 3%  | 62% | T3, N2   | IIIA  | IDC     | G2 | 2 | 3+ |
| 36 | Positive    | Positive  | 61% | 32% | T3, N1   | IIIB  | IDC     | G2 | 3 | 3+ |
| 37 | Positive    | Neg       | 9%  | 2%  | T1, N2   | IIIA  | IDC     | G2 | 4 | 3+ |
| 38 | Positive    | Neg       | 1%  | 73% | T2, N2   | IIIA  | IDC     | G2 | 4 | 3+ |
| 39 | Positive 12 | Neg       | 11% | 0%  | T2, N3   | IIIC  | IDC     | G2 | 2 | 3+ |
| 40 | Positive    | Neg       | 30% | 25% | T4, Nx   | IIIB? | ILC     | G2 | 2 | 2+ |
| 41 | Positive    | Positive, | 67% | 92% | T3, N3   | IIIC  | IDC     | G2 | 3 | 2+ |
| 42 | Positive    | Neg       | 54% | 39% | T2, N2a  | IIIA  | Colloid | G1 | 3 | 2+ |
| 43 | Positive    | Neg       | 15% | 39% | T4b, Nx  | IIIB  | IDC     | G2 | 2 | 3+ |
| 44 | Positive, 4 | Positive  | 47% | 0%  | pT2, pN2 | pIIIA | IDC     | G3 | 1 | 2+ |
| 45 | Positive, 9 | Neg       | 59% | 2%  | T1c, N2a | IIIA  | IDC     | G2 | 1 | 2+ |
| 46 | Positive, 9 | Positive  | 58% | 2%  | T3, N2a  | IIIA  | IDC     | G2 | 4 | 3+ |
| 47 | Positive 80 | 0.5       | 18% | 37% | pT2 N2   | IIIA  | IDC     | G2 | 2 | 2+ |
